# Supplementary material for: Uncertainty of simulated groundwater recharge at different global warming levels: a global-scale multi-model ensemble study
Source: Copernicus journal article supplement (doi:10.5194/hess-25-787-2021), 2021-02-19
Supplement: Supplementary file 2 [file hess-25-787-2021-supplement.zip]

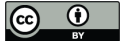

## *Supplement of*

# **Uncertainty of simulated groundwater recharge at different global warming levels: a global-scale multi-model ensemble study**

**Robert Reinecke et al.**

*Correspondence to:* Robert Reinecke ([robert.reinecke@uni-potsdam.de](mailto:robert.reinecke@uni-potsdam.de))

- [hess-25-787-2021-supplement-title-page.pdf](#)
- Supplement
  - [Supplement.pdf](#)
  - [Supplement.zip](#)

The copyright of individual parts of the supplement might differ from the CC BY 4.0 License.
