# Supplementary material for: Uncertainty of simulated groundwater recharge at different global warming levels: a global-scale multi-model ensemble study
Source: Copernicus journal article supplement (doi:10.5194/hess-25-787-2021), 2021-02-19
Supplement: Supplementary file 3 [file hess-25-787-2021-supplement.zip]

Archive with 4 entries (3 files):
- Supplement/
- Supplement/Supplement.pdf
- Supplement/Supplement.zip
- hess-25-787-2021-supplement-title-page.pdf
